# Supplementary material for: Enhancement of the photoluminescence modulation ratio in highly transparent KNN-based ceramics for optical information storage
Source: Royal Society of Chemistry journal article supplement (doi:10.1039/d2tc05290c), 2023-01-01
Supplement: d2tc05290c1.pdf [file d2tc05290c1.pdf]

## Supporting information

### **Enhancement of photoluminescence modulation ratio in highly transparent KNN-based ceramics for optical information storage**

Yaqi Wang<sup>a</sup>, Pengkun Guo<sup>a</sup>, Yanan Wang<sup>a</sup>, Nengmeng Huo<sup>b</sup>, Ruyi Sun<sup>a</sup>, Yongcheng Zhang<sup>a</sup>, Jun-Cheng Zhang<sup>b</sup>, and Yalin Qin<sup>a,\*</sup>

<sup>a</sup> *College of Physics, Key Laboratory of Photonics Materials and Technology in Universities of Shandong, Qingdao University, Qingdao 266071, PR China. E-mail: yalinqin@qdu.edu.cn*

<sup>b</sup> *Faculty of Information Science and Engineering, Ocean University of China, Qingdao 266100, PR China*

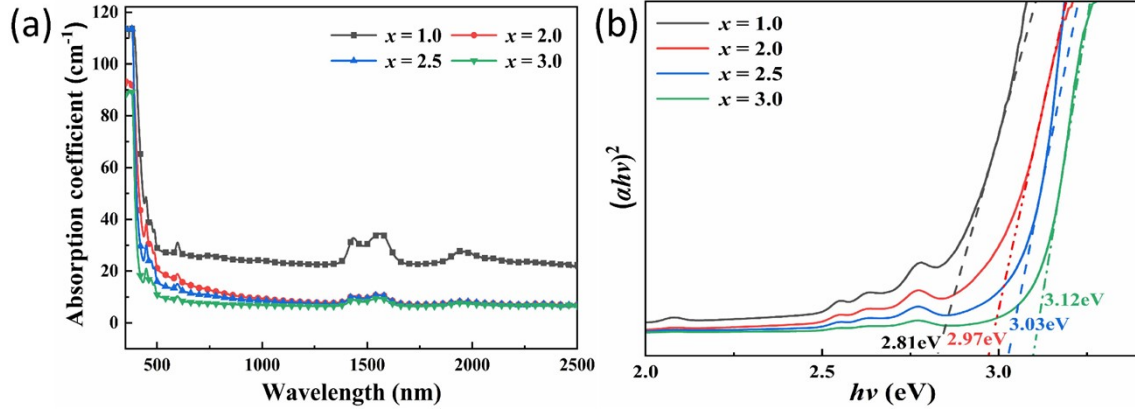

**Fig. S1** (a) Absorption coefficient spectra of KNN-xPr ceramics ( $t = 0.045$  cm). (b) The plots of  $(\alpha h\nu)^2$  vs.  $h\nu$ , and the energy band gap ( $E_g$ ).

The relationship between  $E_g$  and photon frequency follows the Tauc equation:<sup>1,2</sup>

$$(\alpha h\nu)^2 = A(h\nu - E_g)$$

where  $h$  is the Planck's constant ( $4.1357 \times 10^{-15}$  eV),  $A$  is a constant,  $\nu$  is the photon frequency, and  $\alpha$  is the absorption coefficient.  $\nu$  and  $\alpha$  can be calculated according to the following equations:

$$\nu = \frac{c}{\lambda}$$

$$\alpha = \frac{1}{t} \ln\left(\frac{1}{T}\right)$$

where  $c$ ,  $t$ ,  $\lambda$ , and  $T$  correspond to the speed of light ( $3.0 \times 10^8$  m/s), sample thickness, wavelength, and transmittance, respectively. When plotting  $(\alpha h\nu)^2$  versus  $h\nu$  and extending the linear part of the curve to  $(\alpha h\nu)^2 = 0$ , the intersection point on the horizontal axis is  $E_g$ .

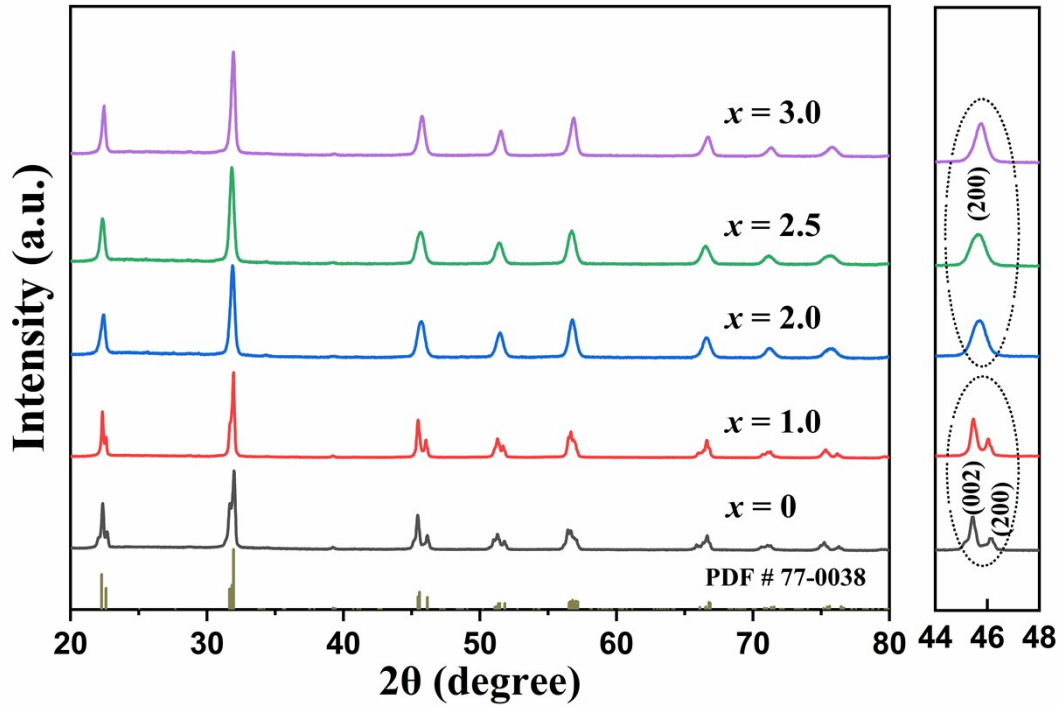

**Fig. S2** (a) XRD patterns of the KNN- $x$ Pr ( $x = 0, 1.0, 2.0, 2.5$  and  $3.0$ ) ceramics. (b) Magnification of peaks at  $2\theta \sim 44\text{--}47^\circ$ .

**Table S1.** Average density and relative density of KNN- $x$ Pr ceramics

| Sample    | Density (g/cm <sup>3</sup> ) |       |       |       |       | Average density (g/cm <sup>3</sup> ) | Theoretical density (g/cm <sup>3</sup> ) | Relative densities (%) |
|-----------|------------------------------|-------|-------|-------|-------|--------------------------------------|------------------------------------------|------------------------|
|           | No. 1                        | No. 2 | No. 3 | No. 4 | No. 5 |                                      |                                          |                        |
| $x = 1.0$ | 4.49                         | 4.52  | 4.35  | 4.56  | 4.47  | 4.46                                 | 4.52                                     | 98.7                   |
| $x = 2.0$ | 4.51                         | 4.49  | 4.52  | 4.52  | 4.54  | 4.52                                 | 4.55                                     | 99.3                   |
| $x = 2.5$ | 4.53                         | 4.48  | 4.52  | 4.58  | 4.53  | 4.53                                 | 4.56                                     | 99.3                   |
| $x = 3.0$ | 4.61                         | 4.46  | 4.55  | 4.57  | 4.54  | 4.55                                 | 4.57                                     | 99.6                   |

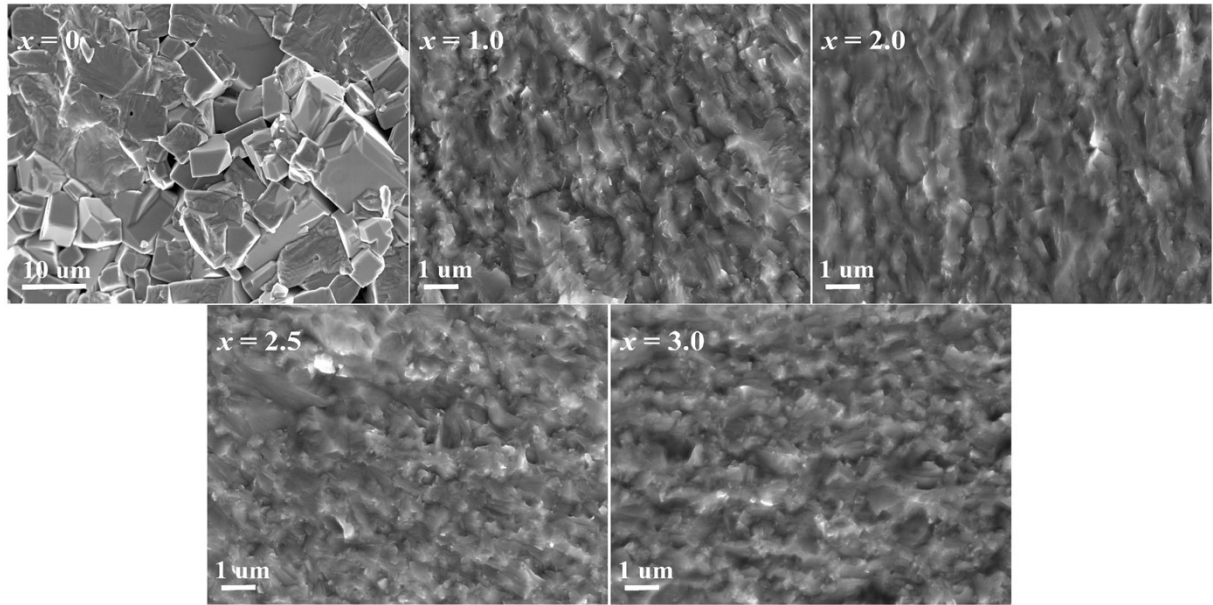

Fig. S3 SEM images of fractured surfaces for the KNN- $x$ Pr ceramics.

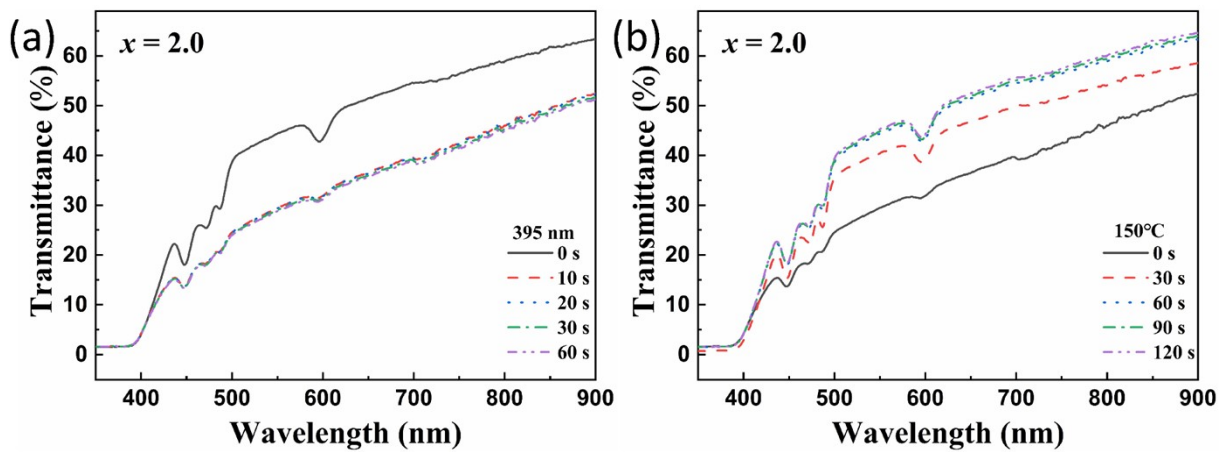

Fig. S4 The dependence of transmittance on heating and illumination time of KNN-2Pr ceramics. (a) Transmittance after 395 nm illumination for different illumination times (0, 10, 20, 30 and 60 s), (b) Transmittance after 150°C heating for different heating times (0, 30, 60, 90 and 120 s) (illuminated by 395 nm for 1 min).

As shown in Fig. S4, when the irradiation time is more than 10 s and the heating time is more than 60 s, the change of transmittance becoming not very large. In order to ensure sufficient time, we chose the illumination time of 30 s and a heating time of 60 s.

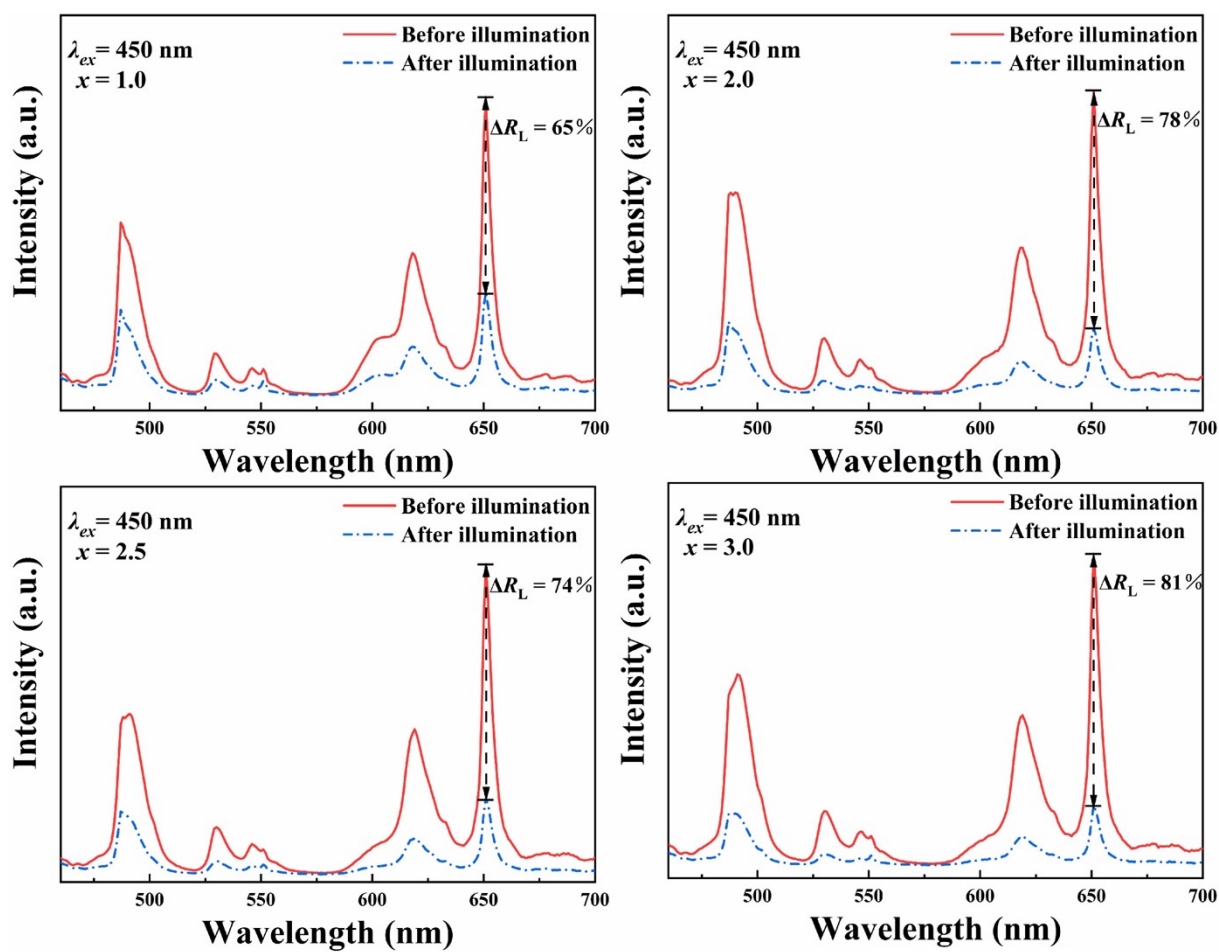

Fig. S5 PL spectra under 450 nm excitation in KNN- $x$ Pr ceramics before and after 395 nm light illumination for 30 s.

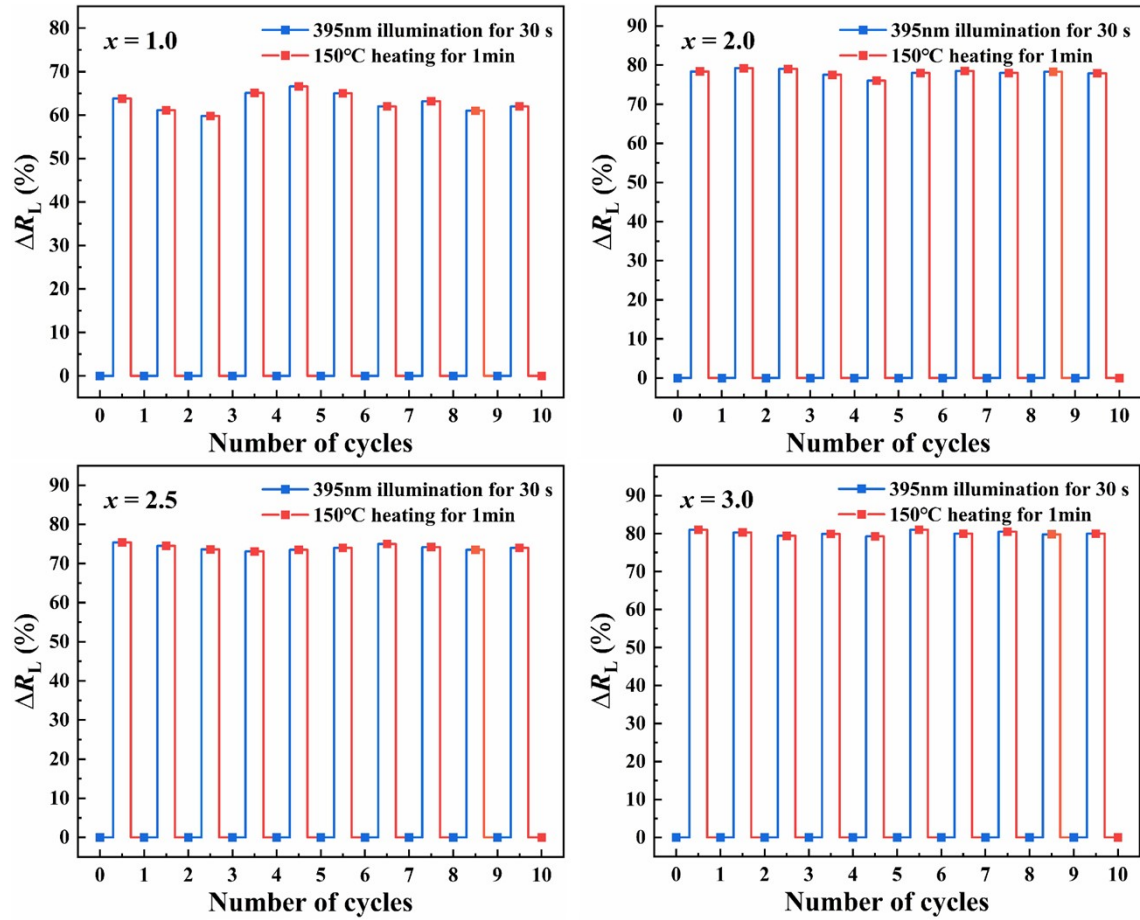

**Fig. S6** Changes of  $\Delta R_L$  in KNN- $x$ Pr ceramics when implementing 395 nm illumination (30 s) and thermal stimulus (150°C for 1 min) alternately for 10 cycles.

## References

- 1 Y. Li, Y. Tang, F. Wang, X. Zhao, J. Chen, Z. Zeng, L. Yang and H. Luo, *Appl. Phys. A*, 2018, **124**, 1-5.
- 2 J. Lin, J. Xu, C. Liu, Y. Lin, X. Wu, C. Lin, X. Zheng and C. Chen, *J. Alloys Compd.*, 2019, **784**, 60-67.
